# Supplementary material
Source: publisher figshare collection journal article supplement (https://karger.figshare.com/ndownloader/files/22232025)
Supplement: Supplementary file 1 [file 22232025]

**Supplementary Table 1:** Clinical, disease and treatment characteristics of T-PLL patients.

T-PLL, t-cell prolymphocytic leukemia; PS, performance status; Hb: hemoglobin; WBC, white blood cells; LDH, lactate dehydrogenase; PB, peripheral blood; BM, bone marrow; HSCT, hematopoietic stem cell transplantation; HDCT, high dose chemotherapy; FBC, fludarabine, busulfan, cyclophosphamide; FC, fludarabine, cyclophosphamide; GvHD, graft versus host disease; DLI, donor lymphocyte infusion; FU, follow-up.

\* In two patients alemtuzumab was followed subsequently by either IDA-FLAG/HAM or pentostatin and subsequent bendamustine.

\*\* In one patient CHOEP-14 was followed by IDA-FLAG and subsequently alemtuzumab.

**Supplementary Table 2:** Characteristics of ten T-PLL patients at time of allogeneic HSCT and last follow-up

HSCT, hematopoietic stem cell transplantation; FU, follow-up; GvHD, graft versus host disease; FBC, fludarabine, busulfan, cyclophosphamide; MUD, matched unrelated donor; CR, complete remission; PD, progressive disease; mMRD, mismatched related donor; mMUD, mismatched unrelated donor; MRD, match related donor.

**Supplementary Table 3:** Immunophenotype by flow cytometry at the time of diagnosis

**Supplemental Table S1:**

| <b>Parameters</b>                                              | <b>n=10</b>      |
|----------------------------------------------------------------|------------------|
| Age, median, years (range)                                     | 63 (40-71)       |
| Males : females                                                | 5 : 5            |
| PS status at diagnosis, 0 vs 1 vs 2                            | 4 : 5 : 1        |
| <b>Laboratory values, median (range)</b>                       |                  |
| Hb, g/L                                                        | 130 (111-140)    |
| WBC, G/L                                                       | 113 (29-992)     |
| Platelets, G/L                                                 | 140 (61-405)     |
| LDH, IU/L                                                      | 781 (206-3418)   |
| <b>Disease sites apart of PB and BM</b>                        |                  |
| Splenomegaly, n (%)                                            | 7/10 (70%)       |
| Lymphadenopathy, n (%)                                         | 6/10 (60%)       |
| Plural effusion, n (%)                                         | 3/10 (30%)       |
| Skin lesions, n (%)                                            | 2/10 (20%)       |
| <b>Cytogenetics</b>                                            | (5/10 available) |
| Chromosome 14 aberration                                       | 3/5              |
| Complex cytogenetics                                           | 1/5              |
| Chromosome 11 aberrations                                      | 2/5              |
| Chromosome 17 aberrations                                      | 1/5              |
| TCL1 rearrangement                                             | 1/5              |
| <b>Induction regimens prior allogeneic HSCT</b>                |                  |
| Alemtuzumab containing regimens                                | 10/10            |
| Alemtuzumab only                                               | 7/10             |
| Alemtuzumab followed by conventional chemotherapy*             | 2/10             |
| Conventional chemotherapy followed by alemtuzumab**            | 1/10             |
| <b>HDCT preceding allogeneic HSCT</b>                          |                  |
| FBC-8                                                          | 5/10             |
| FBC-12                                                         | 3/10             |
| FC                                                             | 2/10             |
| <b>CMV reactivation prior/after HSCT</b>                       | 5/6              |
| <b>GvHD</b>                                                    | 5/10             |
| Limited                                                        | 0/5              |
| Extensive                                                      | 5/5              |
| <b>DLI application following decreased donor chimerism</b>     | 3/10             |
| Donor chimerism reconstitution                                 | 3/3              |
| GvHD induced by DLI                                            | 3/3              |
|                                                                |                  |
| Time from diagnosis to allogeneic HSCT, median, months (range) | 6 (4-13)         |
| Time from diagnosis to last FU, median, months (range)         | 21 (4-96)        |

**Supplemental Table S2:**

| Patient № | Therapy lines № prior allogeneic HSCT | Conditioning regimen | Donor type | Remission status at HSCT | Months from diagnosis to HSCT | Months from diagnosis to last FU | DLI application №/month after HSCT | <u>CMV status donor/recipient before HSCT</u> | CMV reactivation after SCT | GvHD after HSCT/grade I-IV | Relapse/progress in months after allogeneic HSCT | Death in months after allogeneic HSCT | Outcome after HSCT                                      |
|-----------|---------------------------------------|----------------------|------------|--------------------------|-------------------------------|----------------------------------|------------------------------------|-----------------------------------------------|----------------------------|----------------------------|--------------------------------------------------|---------------------------------------|---------------------------------------------------------|
| # 1       | 3                                     | FBC-8                | MUD        | CR                       | 9                             | 37                               | No                                 | <u>positive/positive</u>                      | Yes                        | cGvHD, III                 | No relapse                                       | +28                                   | Death in CR from infection following cGvHD              |
| # 2       | 3                                     | FBC-8                | MUD        | Progress                 | 13                            | 14                               | No                                 | <u>negative/negative</u>                      | No                         | No                         | + 1                                              | +1                                    | Death in PD                                             |
| # 3       | 1                                     | FBC-12               | MUD        | Relapse                  | 4                             | 5                                | No                                 | <u>positive/negative</u>                      | Yes                        | No                         | + 1                                              | +1                                    | Death in PD                                             |
| # 4       | 1                                     | FBC-12               | mMRD       | CR                       | 4                             | 21                               | DLI № 1/+14                        | <u>negative/negative</u>                      | No                         | cGvHD, IV, provoked by DLI | No relapse                                       | +17                                   | Death in CR from infection provoked by DLI induced GvHD |
| # 5       | 1                                     | FC                   | mMUD       | CR                       | 12                            | 87                               | DLI № 5/+4, 9, 64, 66, 68          | <u>positive/negative</u>                      | Yes                        | cGvHD, IV, provoked by DLI | + 59                                             | +75                                   | Death in PD following 2 <sup>nd</sup> allogeneic HSCT   |
| # 6       | 1                                     | FC                   | MRD        | CR                       | 7                             | 96                               | DLI № 5/+2, 3, 4, 85, 88           | <u>positive/positive</u>                      | No                         | cGvHD, IV, provoked by DLI | + 84                                             | +89                                   | Death in PD                                             |
| # 7       | 1                                     | FBC-12               | MUD        | CR                       | 5                             | 18                               | No                                 | <u>positive/negative</u>                      | Yes                        | No                         | + 12                                             | +13                                   | Death in relapse                                        |
| # 8       | 1                                     | FBC                  | MRD        | CR                       | 7                             | 21                               | No                                 | <u>positive/negative</u>                      | No                         | cGvHD, IV                  | No relapse                                       | +14                                   | Death in CR from infection following GvHD               |
| # 9       | 3                                     | FBC-8                | MUD        | Progress                 | 4                             | 4                                | No                                 | <u>positive/positive</u>                      | No                         | No                         | -                                                | +1                                    | Death in septic shock one day after HSCT                |
| # 10      | 1                                     | FBC-8                | MUD        | CR                       | 4                             | 16                               | No                                 | <u>positive/positive</u>                      | Yes                        | No                         | No relapse                                       | +12                                   | Death in CR from CMV pneumonia                          |

**Supplemental Table S3**

| Patient | CD3 | CD4 | CD8 | CD7 | CD52 | CD25 | CD16 | CD56 | CD57 | TCR<br>$\alpha/\beta$ | TCR<br>$\gamma/\delta$ | CD4/CD8<br>ratio |
|---------|-----|-----|-----|-----|------|------|------|------|------|-----------------------|------------------------|------------------|
| #5      | +   | +   | -   | +   | +    | -    | -    | -    | -    | +                     | -                      | 147.88           |
| #6      | +   | -   | +   | +   | +    | (+)  | -    | -    | -    | +                     | -                      | 0.02             |
| #7      | -   | +   | -   | +   | +    | -    | -    | -    | -    | -                     | -                      | 318.70           |
